# Supplementary material for: Using Topomer Comparative Molecular Field Analysis to Elucidate Activity Differences of Aminomethylenethiophene Derivatives as Lysyl Oxidase Inhibitors: Implications for Rational Design of Antimetastatic Agents for Cancer Therapy
Source: Hindawi journal article supplement (doi:10.1155/2020/2036585), 2020-05-16
Supplement: f1 [file 2036585.f1.doc]

**Highlights**

- QSAR introduced into the structure-activity relationship of lysyl oxidase (LOX) inhibitors.
- Molecular fields such as steric effect and electrostatic interaction considered.
- Theoretically predicted anti-LOX potency match with experimental values.
- Novel aminomethylenethiophene-based molecules with decent LOX inhibition proposed.
